# Supplementary material
Source: PubMed Central journal article supplement (PMC4822674)
Supplement: CJN.08530815_CJN08530815SupplementaryData1.pdf [file CJN.08530815_CJN08530815SupplementaryData1.pdf]

Paul E. Drawz, MD, MHS, MS<sup>a</sup>, Arnold B. Alper, MD, MPH<sup>b</sup>, Amanda H. Anderson, PhD, MPH<sup>c</sup>, Carolyn S. Brecklin, MD<sup>d</sup>, Jeanne Charleston, RN<sup>e</sup>, Jing Chen, MD, MSc<sup>b</sup>, Rajat Deo, MD, MTR,<sup>f</sup> Michael J. Fischer, MD, MSPH<sup>g</sup>, Jiang He, MD<sup>h</sup>, Chi-yuan Hsu, MD, MSc<sup>i</sup>, Yonghong Huan, MD<sup>j</sup>, Martin G. Keane, MD<sup>k</sup>, John W. Kusek, PhD<sup>l</sup>, Gail K. Makos, RN, MSN<sup>m</sup>, Edgar R. Miller, III, MD, PhD<sup>n</sup>, Elsayed Z. Soliman, MD, MSc, MS<sup>o</sup>, Susan P. Steigerwalt, MD<sup>p</sup>, Jonathan J. Taliercio, DO<sup>q</sup>, Raymond R. Townsend, MD<sup>j</sup>, Matthew R. Weir, MD<sup>r</sup>, Jackson T Wright, Jr, MD, PhD<sup>s</sup>, Dawei Xie, PhD<sup>c</sup>, and Mahboob Rahman, MD, MS<sup>s</sup>, and the CRIC Study Investigators

- a. Division of Renal Diseases & Hypertension, University of Minnesota, Minneapolis, MN
- b. Section of Nephrology and Hypertension, Tulane University School of Medicine, New Orleans, LA
- c. Department of Biostatistics and Epidemiology, University of Pennsylvania Perelman School of Medicine, Philadelphia, PA
- d. Department of Medicine, University of Illinois at Chicago, Chicago, Illinois
- e. Welch Center for Prevention, Epidemiology, and Clinical Research, Johns Hopkins University, Baltimore, MD
- f. Department of Medicine, Division of Cardiovascular Medicine, University of Pennsylvania Perelman School of Medicine, Philadelphia, PA
- g. Department of Medicine, University of Illinois at Chicago, Center of Innovation for Complex Chronic Healthcare, Jesse Brown VA Medical Center, Chicago, IL
- h. School of Public Health and Tropical Medicine, Tulane University, New Orleans, LA
- i. Division of Nephrology, University of California, San Francisco, San Francisco, CA, Division of Research, Kaiser Permanente Northern California, Oakland, CA
- j. Renal Electrolyte and Hypertension Division, University of Pennsylvania Perelman School of Medicine, Philadelphia, PA
- k. Department of Medicine, Temple Heart and Vascular Center, Philadelphia, PA
- l. National Institute of Diabetes and Digestive and Kidney Diseases, Bethesda, MD
- m. St Clair Specialty Physicians, P.C., Chronic Kidney Disease Clinic, and Renaissance Renal Research Institute; Detroit, MI
- n. Johns Hopkins University, School of Public Health, Department of Medicine, Baltimore, MD
- o. Epidemiological Cardiology Research Center, Department of Epidemiology, and Department of Medicine-Cardiology, Wake Forest School of Medicine, Winston Salem, NC
- p. Division of Cardiovascular Medicine, Department of Internal Medicine, University of Michigan, Ann Arbor, MI
- q. Department of Nephrology and Hypertension, Glickman Urological and Kidney Institute, Cleveland Clinic, Cleveland, OH
- r. Division of Nephrology, Department of Medicine, University of Maryland School of Medicine, Baltimore, MD
- s. University Hospitals Case Medical Center, Louis Stokes Cleveland VAMC, Division of Nephrology and Hypertension, Case Western Reserve University, Cleveland, OH
