# Supplementary material
Source: PubMed Central journal article supplement (PMC4822674)
Supplement: CJN.08530815_CJN08530815SupplementaryData2.pdf [file CJN.08530815_CJN08530815SupplementaryData2.pdf]

**Supplemental Table 1. Clinical and demographic characteristics at initial CRIC visit by ABPM status**

|                                    | No ABPM<br>(N = 2447) | ABPM<br>(N = 1492)  | <i>P</i> value |
|------------------------------------|-----------------------|---------------------|----------------|
| Age (yr)                           | 58.0 (11.5)           | 58.4 (10.2)         | 0.20           |
| Gender                             |                       |                     | 0.34           |
| Male                               | 1328 (54.3)           | 833 (55.8)          |                |
| Female                             | 1119 (45.7)           | 659 (44.2)          |                |
| Race                               |                       |                     | 0.006          |
| Non-Hispanic white                 | 966 (39.5)            | 672 (45.0)          |                |
| Non-Hispanic black/African Amer.   | 1069 (43.7)           | 581 (38.9)          |                |
| Hispanic                           | 314 (12.8)            | 183 (12.3)          |                |
| Other                              | 98 (4.0)              | 56 (3.8)            |                |
| Educational attainment             |                       |                     | <0.001         |
| Less than high school              | 577 (23.6)            | 251 (16.8)          |                |
| High school diploma                | 484 (19.8)            | 257 (17.2)          |                |
| Post-high school education         | 683 (27.9)            | 463 (31.1)          |                |
| ≥ College graduate                 | 703 (28.7)            | 520 (34.9)          |                |
| Medical history                    |                       |                     |                |
| Hypertension                       | 2125 (86.8)           | 1266 (84.9)         | 0.08           |
| MI or coronary revascularization   | 567 (23.2)            | 295 (19.8)          | 0.01           |
| Chronic heart failure              | 287 (11.7)            | 95 (6.4)            | <0.001         |
| Diabetes                           | 1282 (52.4)           | 625 (41.9)          | <0.001         |
| BP variables                       |                       |                     |                |
| SBP (mmHg)                         | 130.9 (23.6)          | 124.6 (19.1)        | <0.001         |
| DBP (mmHg)                         | 71.9 (13.3)           | 71.0 (11.9)         | 0.03           |
| BP <140/90 mmHg at baseline        | 1619 (66.2)           | 1167 (78.2)         | <0.001         |
| BMI (kg/m <sup>2</sup> )           | 32.5 (8.4)            | 31.4 (6.7)          | <0.001         |
| Kidney function measures           |                       |                     |                |
| eGFR (ml/min/1.73 m <sup>2</sup> ) | 40.6 (13.5)           | 46.6 (12.7)         | <0.001         |
| eGFR (ml/min/1.73 m <sup>2</sup> ) |                       |                     | <0.001         |
| < 30                               | 614 (25.1)            | 150 (10.1)          |                |
| 30 to < 45                         | 963 (39.4)            | 535 (35.9)          |                |
| 45 to < 60                         | 666 (27.2)            | 599 (40.1)          |                |
| ≥ 60                               | 204 (8.3)             | 208 (13.9)          |                |
| Urine protein/24 h (g/24h)         | 0.28 (0.08 to 1.42)   | 0.11 (0.06 to 0.41) | <0.001         |
| ACEI or ARB therapy                | 1666 (68.6)           | 1022 (69.0)         | 0.77           |
| Serum albumin (g/dl)               | 3.87 (0.5)            | 4.04 (0.4)          | <0.001         |

\* mean ± SD for continuous variables, median and IQR for skewed variables, and n (%) for categorical variables

**Supplemental Table 2. Relationship between BP category and left ventricular mass and pulse wave velocity by time between ABPM and LVMI/PWV measurement**

| BP category                         | Left ventricular mass index* |                        | Pulse wave velocity*     |                          |
|-------------------------------------|------------------------------|------------------------|--------------------------|--------------------------|
|                                     | <6 months<br>(N = 573)       | >6 months<br>(N = 913) | <6 months<br>(N = 561)   | >6 months<br>(N = 833)   |
| Controlled clinic and ambulatory BP | Ref                          | Ref                    | Ref                      | Ref                      |
| White-coat hypertension             | 2.67 (-2.5 to 7.8)           | -2.23 (-6.6 to 2.2)    | <b>1.23 (0.1 to 2.4)</b> | 0.26 (-0.8 to 1.3)       |
| Masked hypertension                 | <b>3.59 (0.9 to 6.3)</b>     | 1.96 (-0.04 to 4.0)    | <b>0.95 (0.3 to 1.6)</b> | <b>0.89 (0.4 to 1.4)</b> |
| Sustained hypertension              | <b>3.74 (0.7 to 6.8)</b>     | 1.99 (-0.5 to 4.5)     | <b>1.14 (0.4 to 1.9)</b> | <b>0.79 (0.1 to 1.4)</b> |

\* Adjusted for age, sex, race, clinical center, tobacco use, ACEI/ARBs, diuretics, beta blockers, calcium channel blockers, total number of antihypertensives, coronary artery disease, congestive heart failure, diabetes, BMI, eGFR, urine protein, LDL cholesterol, serum phosphorus, serum calcium, serum uric acid, CRP, 24hr urine sodium. Bold indicates P <0.05.
